# Supplementary material for: Mettl3-mediated mRNA m6A modification controls postnatal liver development by modulating the transcription factor Hnf4a
Source: PubMed Central journal article supplement (PMC9355946; doi:10.1038/s41467-022-32169-4), 2022-08-05
Supplement: 41467_2022_32169_MOESM1_ESM.pdf [file 41467_2022_32169_MOESM1_ESM.pdf]

**Mettl3-mediated mRNA m<sup>6</sup>A modification controls postnatal liver development  
by modulating the transcription factor Hnf4a**

Yan Xu<sup>1,3,\*</sup>, Zhuowei Zhou<sup>1,\*</sup>, Xinmei Kang<sup>1,\*</sup>, Lijie Pan<sup>1,2</sup>, Chang Liu<sup>1</sup>, Xiaoqi Liang<sup>1,2</sup>, Jiajie Chu<sup>1,2</sup>, Shuai Dong<sup>1</sup>, Yanli Li<sup>1</sup>, Qiuli Liu<sup>1</sup>, Yuetong Sun<sup>1</sup>, Shanshan Yu<sup>1,2</sup>, Qi Zhang<sup>1,2,3,#</sup>

| Contents                                 | Pages    |
|------------------------------------------|----------|
| Supplementary Figures and Figure legends | 2 to 19  |
| Supplementary Tables                     | 20 to 28 |
| Supplementary Datasets                   | 29       |
| Supplementary References                 | 30       |

Supplementary materials: 9 Figures; 3 Tables; 5 Datasets

## Supplementary Figures and Figure legends

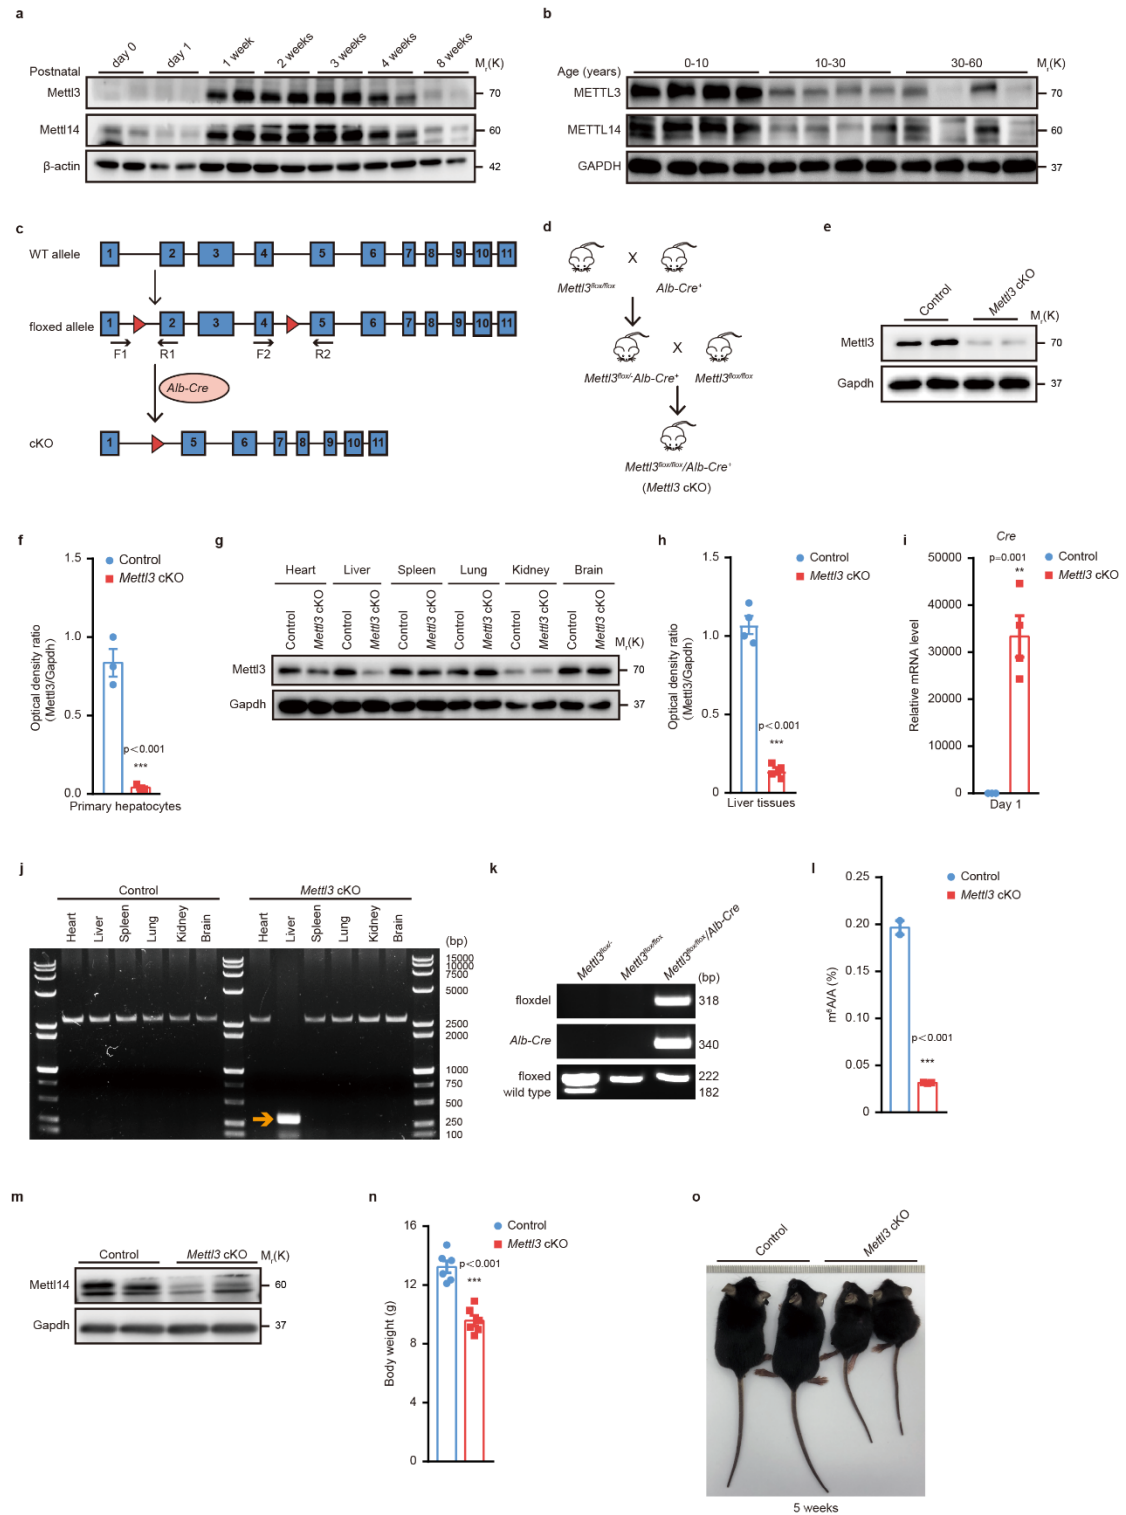

**Supplementary Fig. 1. Liver-specific Mettl3 knockout mouse construction and characterization.**

(a) Western blot for Mettl3 and Mettl14 of mouse liver tissues at indicated time points

after birth (3 experiments were repeated independently with similar results). (b) Western blot for METTL3 and METTL14 of human liver tissues at indicated ages (3 experiments were repeated independently with similar results). (c) Targeting strategy of *Albumin*-enhancer/promoter-driven *Cre*-mediated *Mettl3* conditional knockout mouse construction. Floxed-*Mettl3* allele was generated by flanking exons 2 and 4 with loxP sites. Hepatocyte-specific conditional knockout of *Mettl3* (*Mettl3* cKO) was achieved by crossing floxed-*Mettl3* mice with *Alb*-enhancer/promoter-driven *Cre* transgenic mice. (d) Schematic diagram of breeding strategies of *Mettl3* cKO mice. (e) Western blot for *Mettl3* in hepatocytes isolated from Control and *Mettl3* cKO mice (3 experiments were repeated independently with similar results). (f) Densitometry analysis of western blot for *Mettl3* in hepatocytes isolated from Control and *Mettl3* cKO mouse livers in (e) (n = 3 for each group over 3 independent experiments). (g) Western blot for *Mettl3* in indicated tissues from Control and *Mettl3* cKO mice (3 experiments were repeated independently with similar results). (h) Densitometry analysis of western blot for *Mettl3* in Control and *Mettl3* cKO liver tissues in (g) (n = 4 for each group). (i) Quantitation of *Cre* mRNA expression of Control and *Mettl3* cKO liver tissue at day 1 after birth (n = 3 Control group; n = 4 for cKO group). (j) Genomic PCR analysis for floxed allele (amplified with *Mettl3*-F1 and *Mettl3*-R2 primer shown on (c) in indicated tissues from Control and *Mettl3* cKO mice (3 experiments were repeated independently with similar results). (k) Genomic PCR analysis of 1-day-old mouse of indicated genotype (3 experiments were repeated independently with similar results), showing successful knockout of *Mettl3* at day 1

after birth in *Mettl3* cKO mouse liver. Floxed fragments were detected using liver samples as templates, and *Alb-Cre* and floxed/wild type fragments were detected using mouse tail samples as templates. (l) LC-MS/MS analysis of m<sup>6</sup>A mRNA modification in Control and *Mettl3* cKO mouse liver tissue (n = 2 for Control group; n = 3 for cKO group). (m) Western blot for Mettl14 of Control and *Mettl3* cKO mouse liver tissues 2 weeks after birth (3 experiments were repeated independently with similar results). (n) Body weight of female Control and *Mettl3* cKO littermates at 4 weeks after birth (n = 6 for each group). (o) Representative appearances of Control and *Mettl3* cKO littermates at 5 weeks after birth (10 experiments were repeated independently with similar results). Data in (f), (h), (i), (l), and (n) were shown as mean ± SEM with the indicated significance (\*\*\*P < 0.001; two-tailed student's *t*-test). Source data are provided as a Source Data file.

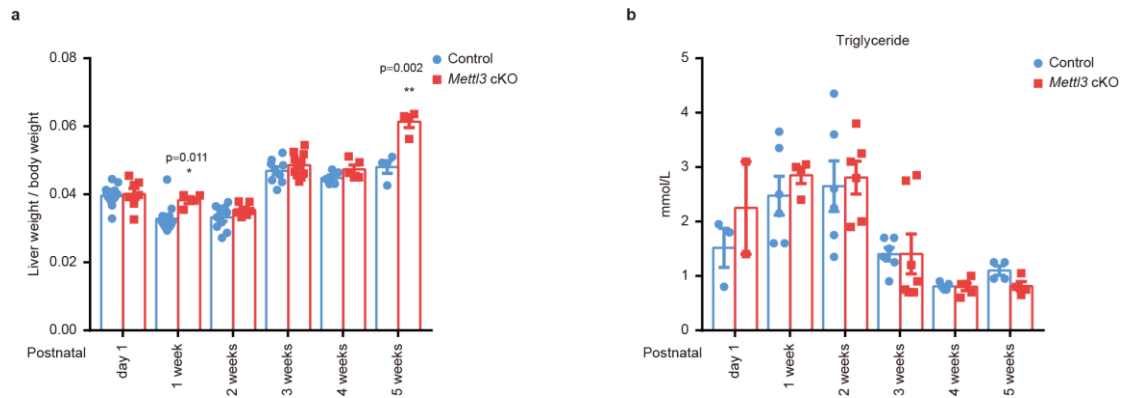

**Supplementary Fig. 2. Liver weight to body weight ratio and serum triglyceride levels of Control and *Mettl3* cKO mice.**

(a) Ratio of liver weight to body weight of Control and *Mettl3* cKO mice at different time points postnatally (n = 4 for 1 week cKO group and 5 weeks groups; n = 5 for 4 weeks groups; n = 6 for 2 weeks cKO group; n = 7 for day 1 cKO group; n = 9 for 3 weeks Control group; n = 12 for 3 weeks cKO group; n = 15 for day 1 Control group and 1 week Control group). (b) Serum levels of triglyceride of Control and *Mettl3* cKO mice at different time points postnatally (n = 2 for day 1 cKO group; n = 3 for day 1 Control group; n = 4 for 1 week cKO group; n = 5 for 4 weeks groups; n = 7 for 3 weeks cKO group; n = 6 for other groups). Data in (a) and (b) were shown as mean  $\pm$  SEM with the indicated significance (\*p < 0.05, \*\*p < 0.01; two-tailed student's *t*-test). Source data are provided as a Source Data file.

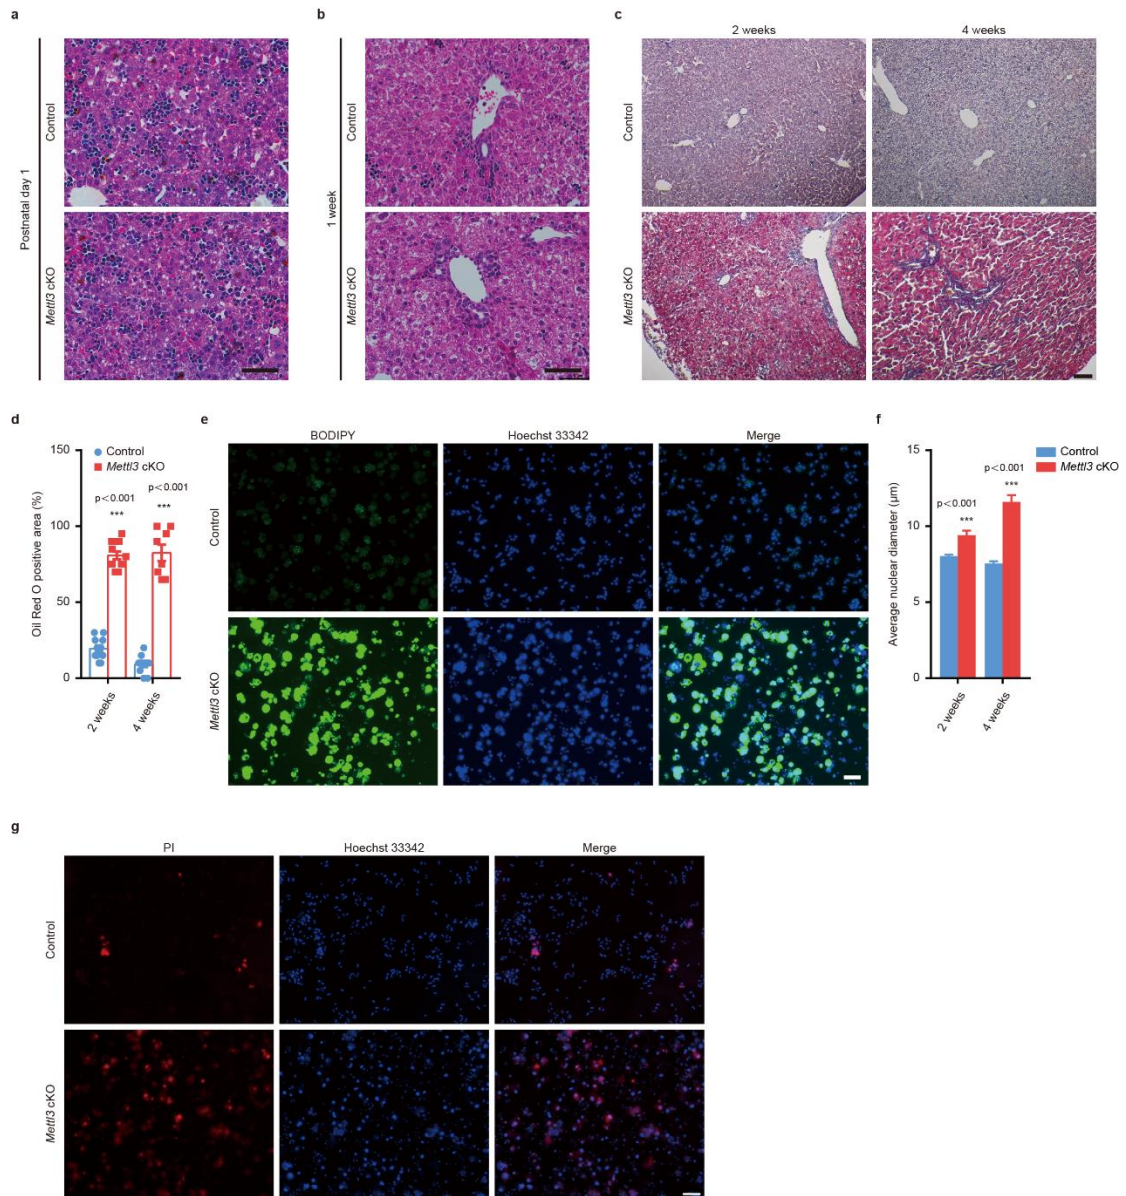

**Supplementary Fig. 3. Hepatic *Mettl3* deletion results in liver injury.**

(a) and (b) Representative H&E staining photographs of liver sections from Control and *Mettl3* cKO mice at 1 day (a) and 1 week (b) after birth (10 experiments were repeated independently with similar results). Scale bar = 50  $\mu\text{m}$ . (c) Representative Oil Red O staining photographs of liver sections from Control and *Mettl3* cKO mice at 2 weeks and 4 weeks postnatally (6 experiments were repeated independently with similar results). Scale bar = 100  $\mu\text{m}$ . (d) Quantification of Oil Red O positive area shown in (c) ( $n = 8$  for 4 weeks cKO group;  $n = 12$  for other groups). (e)

Representative BODIPY staining fluorescent photographs of primary hepatocytes isolated from Control and *Mettl3* cKO mice (6 experiments were repeated independently with similar results). Scale bar = 100  $\mu\text{m}$ . (f) Quantitation of average nuclear diameter of liver sections from Control and *Mettl3* cKO mice (n = 45 for 4 weeks cKO group; n = 56 for 2 weeks cKO group; n = 67 for 2 weeks Control group; n = 78 for 4 weeks Control group). (g) Representative PI staining photographs of primary hepatocytes isolated from Control and *Mettl3* cKO mice (3 experiments were repeated independently with similar results). Scale bar = 100  $\mu\text{m}$ . Data in (d) and (f) were shown as mean  $\pm$  SEM with the indicated significance (\*\*p < 0.01, \*\*\*p < 0.001; two-tailed student's *t*-test). Source data are provided as a Source Data file.



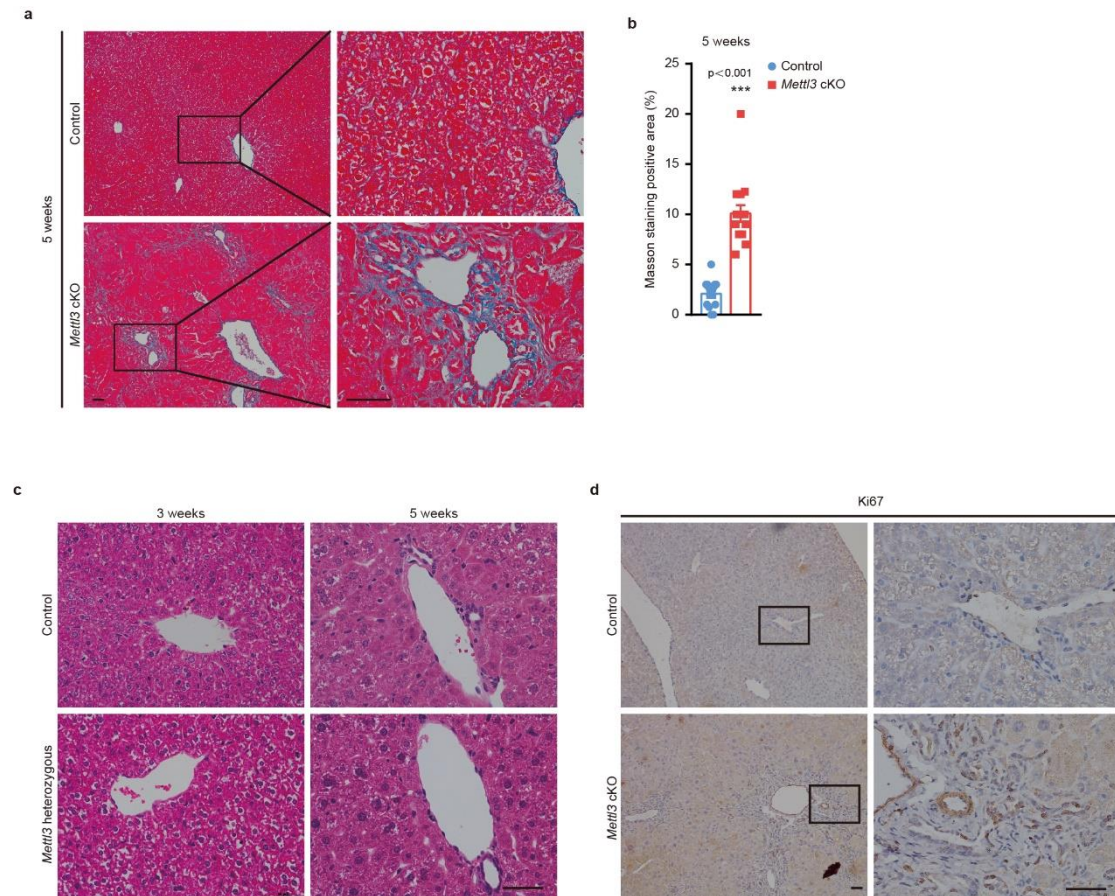

**Supplementary Fig. 4. Histological analysis of Control and *Mettl3* cKO liver sections.**

(a) Representative Masson's trichrome staining photographs of liver sections from Control and *Mettl3* cKO mice at 5 weeks after birth. Scale bar = 50  $\mu$ m. (b) Quantification of Masson's trichrome staining positive area (n = 15 for each group). (c) Representative H&E staining photographs of liver sections from Control and *Mettl3* heterozygous mice at 3 weeks and 5 weeks after birth (10 experiments were repeated independently with similar results). Scale bar = 50  $\mu$ m. (d) Representative Ki67 immunohistochemistry staining photographs of liver sections from 5-week-old Control and *Mettl3* cKO mice (6 experiments were repeated independently with similar results). Scale bar = 50  $\mu$ m. Data in (b) were shown as mean  $\pm$  SEM with the



indicated significance (\*\*\*)  $p < 0.001$ ; two-tailed student's  $t$ -test). Source data are provided as a Source Data file.

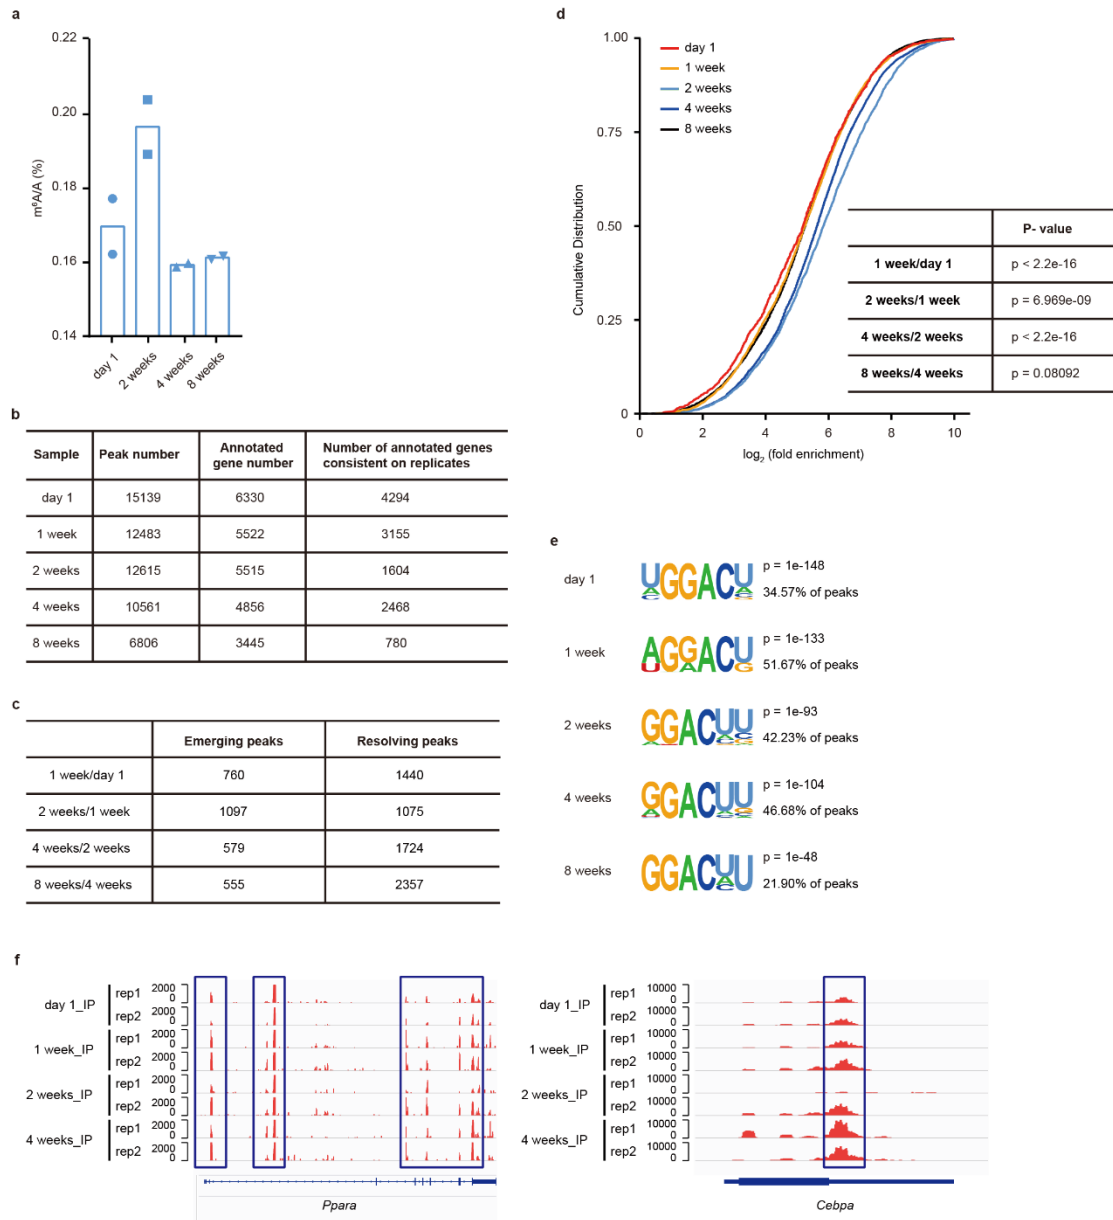

**Supplementary Fig. 5. Dynamic m<sup>6</sup>A modifications in postnatal mouse liver development.**

(a) LC-MS/MS analysis of m<sup>6</sup>A modification in mouse liver tissues collected at indicated time points ( $n = 2$  for each group). (b) Summary of peak number, the number of annotated genes, and the number of annotated genes in each group in m<sup>6</sup>A-RIP sequencing. (c) Summary of dynamic changes of m<sup>6</sup>A-immunoprecipitated peaks in different stages of postnatal liver development. (d) Cumulative distribution

of m<sup>6</sup>A-immunoprecipitated peak enrichment in mouse liver tissue at indicated time points. Kolmogorov-Smirnov test (KS-test) was performed to compare m<sup>6</sup>A distributions among indicated ages. (e) Motif analysis of the identified m<sup>6</sup>A-immunoprecipitated peaks. P-value was calculated automatically by HOMER software. (f) Genome Browser screenshots of m<sup>6</sup>A-RIP sequencing read density signals under 4 different time points after birth at *Ppara* and *Cebpa* locus. Two replicates were contained for each time point. Source data are provided as a Source Data file.

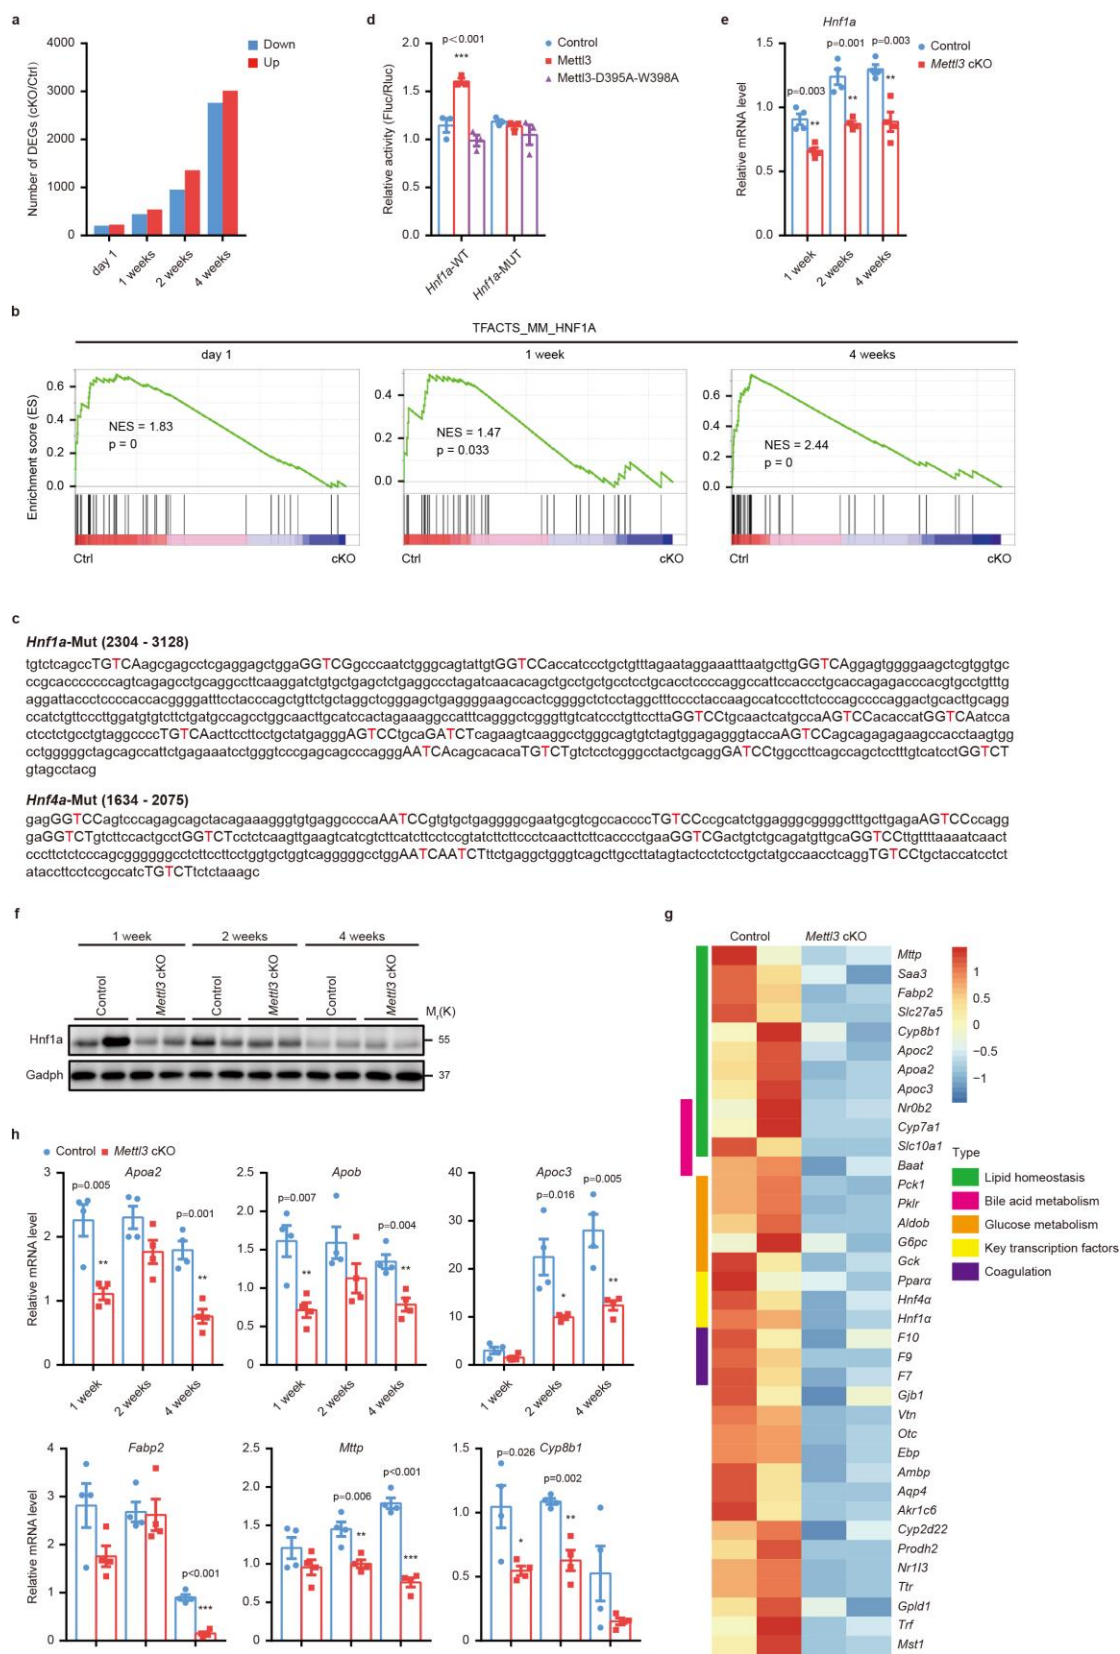

**Supplementary Fig. 6. Mettl3-mediated m<sup>6</sup>A regulates the liver-enriched transcription factor network.**

(a) Numbers of differentially regulated genes (DEGs) of Control and *Mettl3* cKO mice at indicated time points after birth. (b) Gene set enrichment analysis (GSEA) for *Hnf1a* pathways in RNA-sequencing data of Control and *Mettl3* cKO liver tissues at 1 day, 1 week, and 4 weeks after birth. (c) WT and mutated (Mut) m<sup>6</sup>A-enriched regions of *Hnf1a* and *Hnf4a* were used in dual-luciferase reporter assays. Putative m<sup>6</sup>A consensus sequences were in bold while the mutation sites in red. (d) Dual-luciferase reporter assays showing the effect of WT and catalytic mutant *Mettl3* on *Hnf1a* reporters with either WT or mutated m<sup>6</sup>A-modified sites (n = 3 for each group over 3 independent experiments). (e) RT-qPCR for mRNA levels of *Hnf1a* at different time points in Control and *Mettl3* cKO mouse liver tissues (n = 4 for each group). (f) Western blot for *Hnf1a* from Control and *Mettl3* cKO mice liver tissues at 1 week, 2 weeks, and 4 weeks after birth (3 experiments were repeated independently with similar results). (g) The heatmap showing expression levels of *Hnf4a* downstream targets in 4-week-old Control and *Mettl3* cKO mouse livers in RNA-sequencing data. (h) RT-qPCR analysis of *Hnf4a* target genes from Control and *Mettl3* cKO mouse liver tissues at different postnatal time points (n = 4 for each group). Data in (d), (e), and (h) were shown as mean ± SEM with the indicated significance (\*p < 0.05, \*\*p < 0.01, \*\*\*p < 0.001; two-tailed student's *t*-test). Source data are provided as a Source Data file.

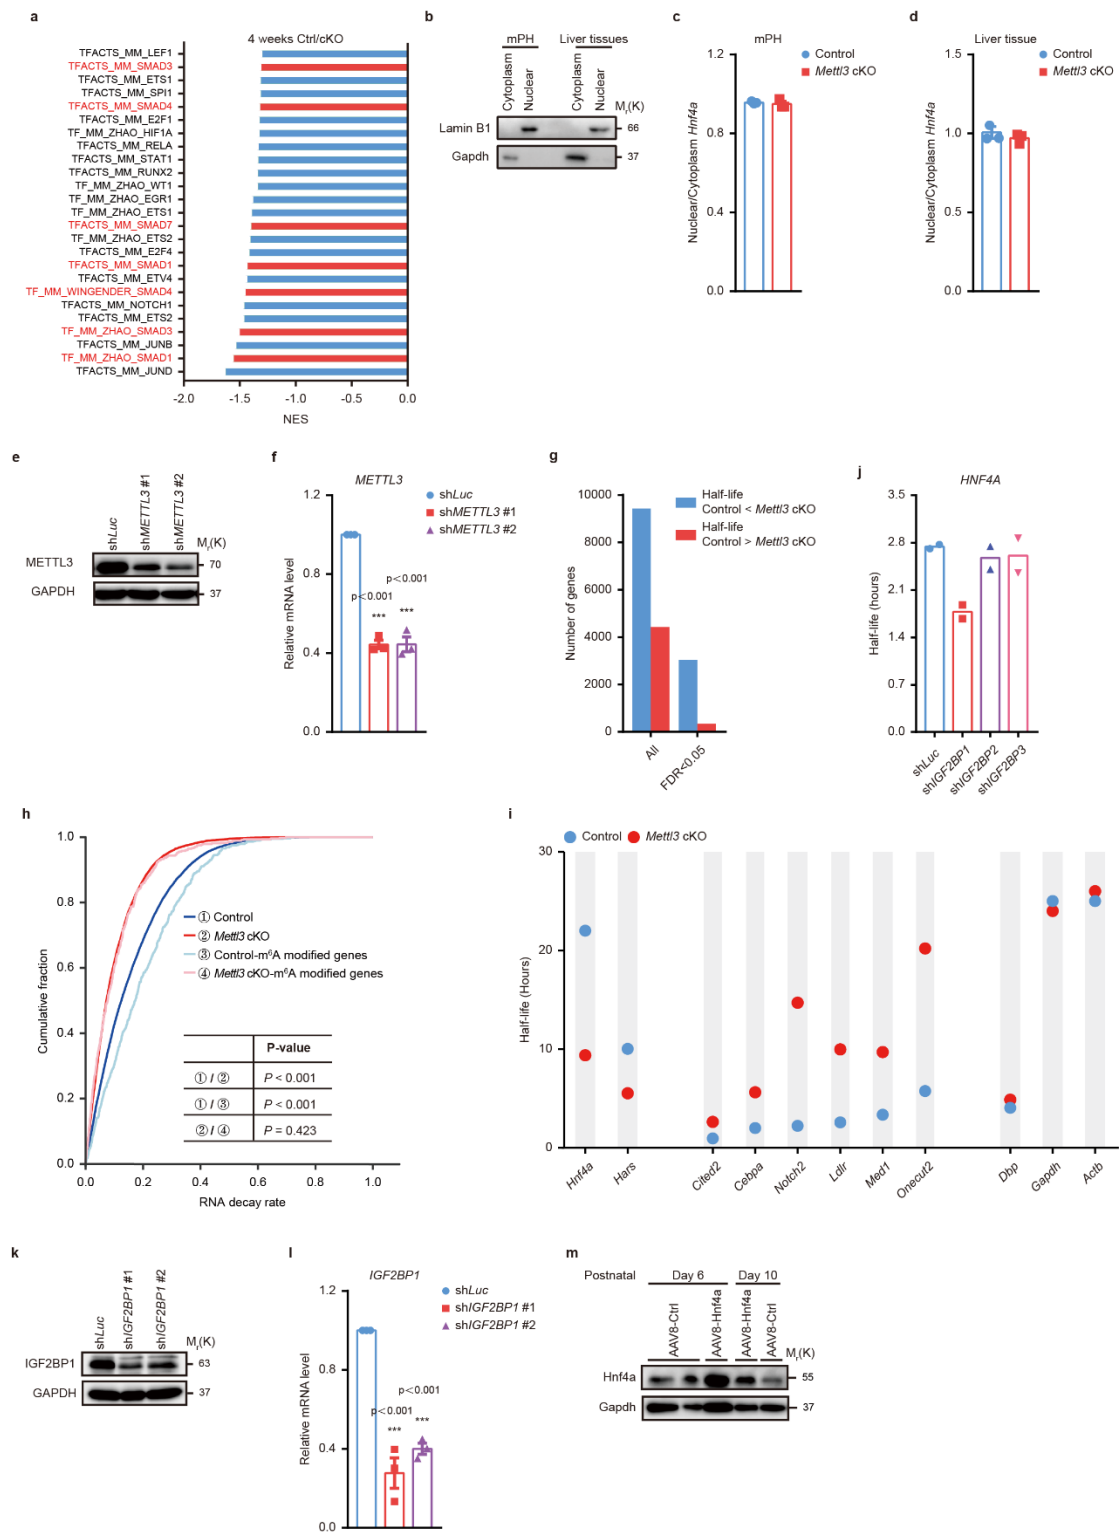

**Supplementary Fig. 7. *Mettl3* knockout decreases *Hnf4a* mRNA stability in postnatal liver development.**

(a) GSEA analysis of RNA-sequencing showed that *Smad* signaling was significantly enriched in *Mettl3* cKO liver tissues at 4 weeks after birth. (b) Western blot showing

Lamin B1 (a marker for nuclear fraction) and Gapdh (marker for cytoplasm fraction) protein level in isolated cytoplasm and nuclear fractions from mouse primary hepatocytes and liver tissues (3 experiments were repeated independently with similar results), indicating successful separation of two fractions. (c) Nuclear/cytoplasm *Hnf4a* mRNA level in Control and *Mettl3* cKO primary hepatocytes (n = 3 for each group). (d) Nuclear/cytoplasm *Hnf4a* mRNA level in Control and *Mettl3* cKO liver tissues (n = 3 for each group). (e) Western blot of METTL3 in HepG2 cells with METTL3 knockdown with 2 independent small Hairpin RNA (shRNA) targeting *METTL3*. shRNA targeting firefly luciferase (*shLuc*) was used as a control (also hereafter in similar experiments). (f) *METTL3* relative mRNA level in HepG2 cells with or without METTL3 knockdown (n = 3 for each group). (g) Histogram showing differences of mRNA half-life between Control and *Mettl3* cKO primary hepatocytes. (h) Cumulative fraction curves of total or m<sup>6</sup>A-modified genes of primary hepatocytes from Control and *Mettl3* cKO mice showing differential global RNA decay rate in each group. (i) Half-life of selected genes with downregulated, upregulated, or unchanged mRNA stability between Control and *Mettl3* cKO primary hepatocytes. Data in (g), (h), and (i) were analyzed from RNA-sequencing data in Supplementary Dataset 5. (j) *HNF4A* mRNA half-life in IGF2BP1, IGF2BP2, or IGF2BP3 knockdown in HepG2 cell line. Results were collected from published RNA-sequencing data (GSE90684). (k) Western blot of IGF2BP1 in HepG2 cells with or without IGF2BP1 knockdown. (l) *IGF2BP1* relative mRNA level in HepG2 cells with or without IGF2BP1 knockdown (n = 3 for each group). (m) *Mettl3* cKO mice



were intravenously injected with AAV8-Ctrl or AAV8-Hnf4a at day 2, and liver tissues were collected at indicated time points for Western blot of Hnf4a (3 experiments were repeated independently with similar results). Data in (c), (d), (f), (j) and (l) were shown as mean  $\pm$  SEM with the indicated significance (\*\*\*) ( $p < 0.001$ ; two-tailed student's *t*-test). Source data are provided as a Source Data file.

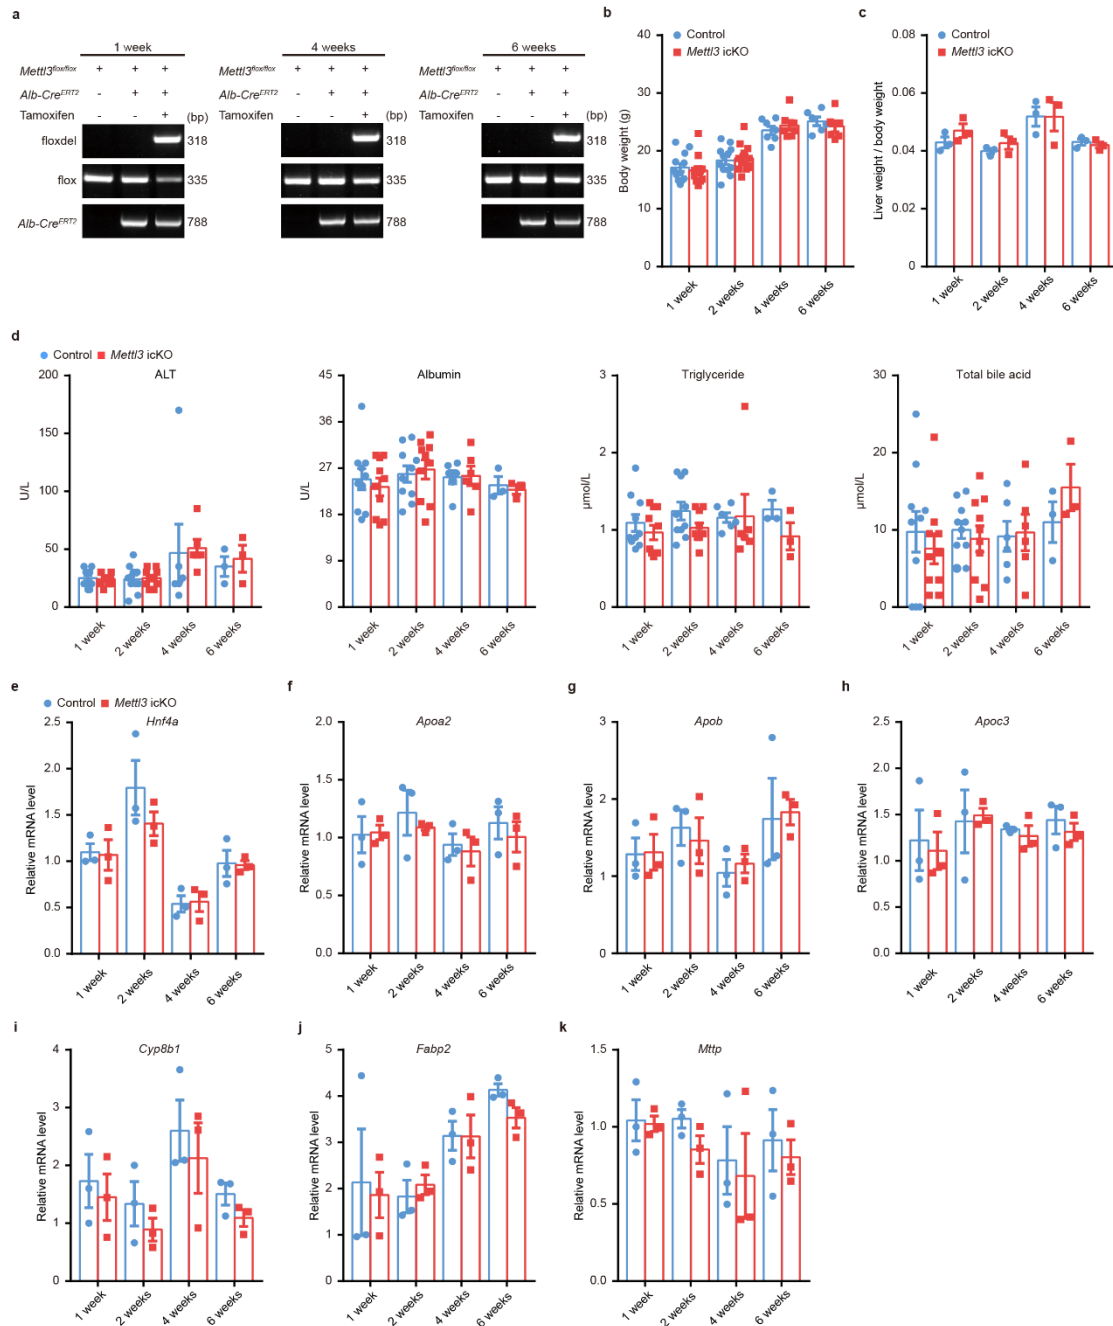

**Supplementary Fig. 8. Mettl3 has minimal effects on adult liver homeostasis.**

(a) Genomic PCR of Control and inducible liver-specific *Mettl3* knockout (*Mettl3* icKO) mice (3 experiments were repeated independently with similar results). Floxedel fragments were detected using liver samples as templates by *Mettl3*-F1 and *Mettl3*-R2 primers. Flox and *Alb-Cre<sup>ERT</sup>* fragments were detected using mouse tail samples as templates. Flox fragments were amplified by *Mettl3*-F2 and *Mettl3*-R2 primers, and

*Alb-Cre<sup>ERT</sup>* fragments were amplified by *Alb-CreERT-F* and *Alb-CreERT-R* primers.

(b) Body weight of Control and *Mettl3* icKO littermates at different time points after tamoxifen treatment (n = 6 for 6 weeks groups; n = 7 for 4 weeks groups; n = 12 for other groups). (c) The ratio of liver weight to body weight of Control and *Mettl3* icKO mice at different time points after tamoxifen treatment (n = 3 for each group). (d) Serum levels of AST, ALB, Triglyceride, and Total bile acid of Control and *Mettl3* icKO mice at different time points after tamoxifen treatment (n = 3 for 6 weeks groups; n = 6 for 4 weeks groups; n = 10 for other groups). (e-k) RT-qPCR analysis of *Hnf4a* (e) and *Hnf4a* downstream targets *Apoa2* (f), *Apob* (g), *Apoc3* (h), *Cyp8b1* (i), *Fabp2* (j), and *Mttp* (k) for Control and *Mettl3* icKO mouse liver tissues at different time points after tamoxifen treatment (n = 3 for each group). Data in (b)-(k) were shown as mean ± SEM. Source data are provided as a Source Data file.

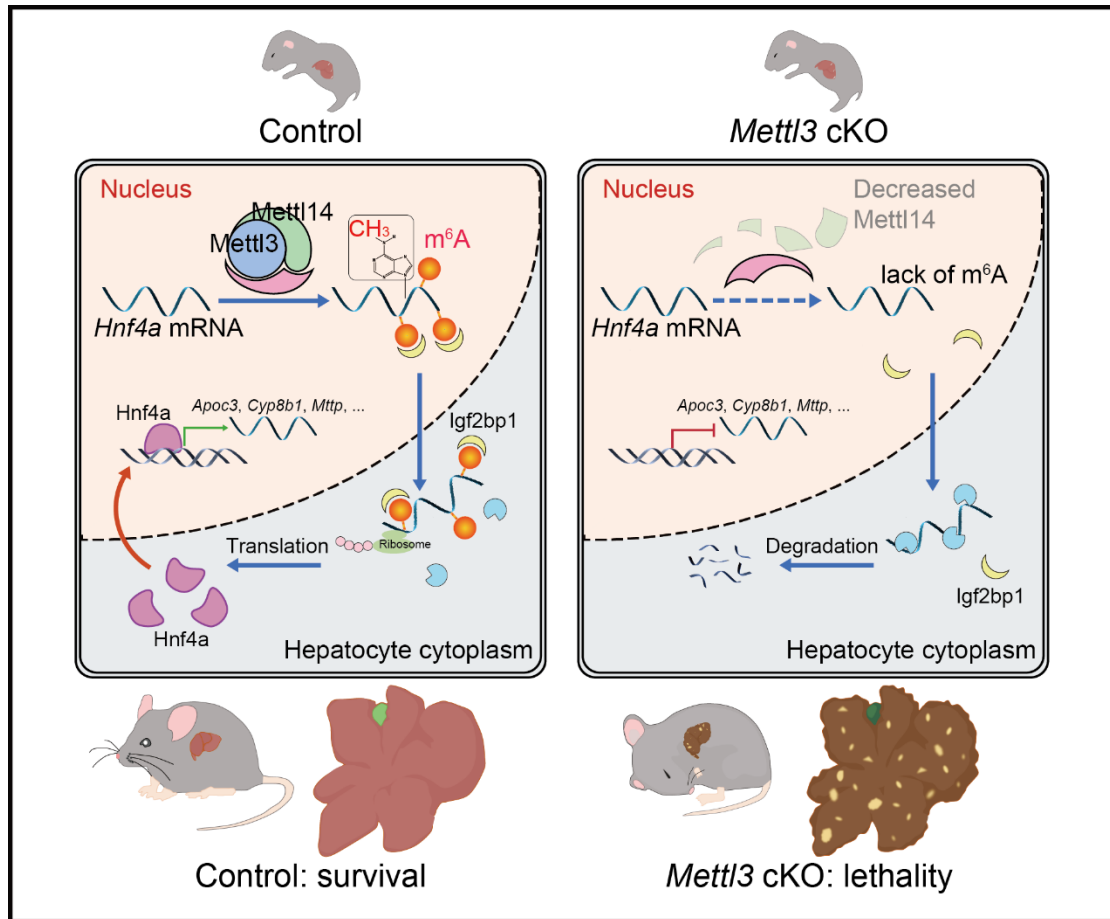

**Supplementary Fig. 9. Graphic abstract showing Mettl3-mediated m<sup>6</sup>A modification controls postnatal liver development by modulating the transcription factor Hnf4a.**

## Supplementary Tables

### Supplementary Table 1. Primers

#### 1. Primers for molecular cloning and genotyping

| Name                  | Sequences                                           |
|-----------------------|-----------------------------------------------------|
| <i>Mettl3</i> -F1     | 5'-AGAGGAGGAGAAGGTGGCAGAG-3'                        |
| <i>Mettl3</i> -R1     | 5'-CCTTTCATTCACATGGCAGCAC-3'                        |
| <i>Mettl3</i> -F2     | 5'-AGGCTCACTTGCAAGTAAAAGGAAG-3'                     |
| <i>Mettl3</i> -R2     | 5'-AGGCCTATAATCCTAGCACTG-3'                         |
| <i>Alb-Cre</i> -F     | 5'-GGGCAGTCTGGTACTTCCAAGCT-3'                       |
| <i>Alb-Cre</i> -R     | 5'-TAGCTACCTATGCGATCCAAACAAC-3'                     |
| <i>Alb-CreERT</i> -F  | 5'-TCTCCCCACCTCTAGCCCAAAGAAA-3'                     |
| <i>Alb-CreERT</i> -R  | 5'-AGGCAGAGGACTGTATTGATCAGTC-3'                     |
| <i>Mettl3</i> -PKD-F  | 5'-CCAGGCCTAAGCTTACGCGTATGTTCGGACACGTGGAGC<br>TC-3' |
| <i>Mettl3</i> -PKD-R  | 5'-TCGTCCTTGTAGTCGAATTCTAAATTCTTAGGTTTAGAG<br>A-3'  |
| <i>Mettl3</i> -AWWA-F | 5'-TGTGATGGCTGCCCCACCTGCGGATATTCACATGGAGC<br>TA-3'  |
| <i>Mettl3</i> -AWWA-R | 5'-TGTGAATATCCGCAGGTGGGGCAGCCATCACAACCTGCA<br>AA-3' |

#### 2. Primers for TRC lentiviral vectors encoding shRNA construction

| Name                  | Sequences                                                             |
|-----------------------|-----------------------------------------------------------------------|
| <i>shIGF2BP1</i> -1-F | 5'-CCGGGCAGTGGTGAATGTCACCTATCTCGAGATAGGT<br>GACATTCACCACTGCTTTTTTG-3' |
| <i>shIGF2BP1</i> -1-R | 5'-AATTCAAAAAGCAGTGGTGAATGTCACCTATCTCGAG                              |

|               |                                                                        |
|---------------|------------------------------------------------------------------------|
|               | ATAGGTGACATTCACCACTGC-3'                                               |
| shIGF2BP1-2-F | 5'-CCGGCTCCGCTTGTAAGATGATCTTCTCGAGAAGATC<br>ATCTTACAAGCGGAGTTTTTG-3'   |
| shIGF2BP1-2-R | 5'-AATTCAAAAACCTCCGCTTGTAAGATGATCTTCTCGAG<br>AAGATCATCTTACAAGCGGAG-3'  |
| shMETTL3-1-F  | 5'-CCGGCGTCAGTATCTTGGGCAAGTTCTCGAGAACTTG<br>CCCAAGATACTGACGTTTTTG-3'   |
| shMETTL3-1-R  | 5'-AATTCAAAA CGTCAGTATCTTGGGCAAGTT<br>CTCGAG AACTTGCCCAAGATACTGACG-3'  |
| shMETTL3-2-F  | 5'-CCGGGCCAAGGAACAATCCATTGTTCTCGAGAACAAT<br>GGATTGTTCCCTTGGCTTTTTTG-3' |
| shMETTL3-2-R  | 5'-AATTCAAAA GCCAAGGAACAATCCATTGTT<br>CTCGAG AACAATGGATTGTTCCCTTGGC-3' |

### 3. Primers for RT-qPCR

| Name                       | Sequences                   |
|----------------------------|-----------------------------|
| <i>Cre</i> -RT-F           | 5'-CTCTGACAGATGCCAGGACA-3'  |
| <i>Cre</i> -RT-R           | 5'-GATCAGCATTCTCCCACCAT-3'  |
| human <i>GAPDH</i> -RT-F   | 5'-AATGAAGGGGTCATTGATGG-3'  |
| human <i>GAPDH</i> -RT-R   | 5'-AAGGTGAAGGTCGGAGTCAA-3'  |
| human <i>IGF2BP1</i> -RT-F | 5'-GGCCATCGAGAATTGTTGCAG-3' |
| human <i>IGF2BP1</i> -RT-R | 5'-CCAGGGATCAGGTGAGACTG-3'  |
| human <i>HNF4A</i> -RT-F   | 5'-TGCGACTCTCCAAAACCCTC-3'  |
| human <i>HNF4A</i> -RT-R   | 5'-ATTGCCCATCGTCAACACCT-3'  |
| human <i>METTL3</i> -RT-F  | 5'-GAAGCAGCTGGACTCTCTGC-3'  |
| human <i>METTL3</i> -RT-R  | 5'-ACGGAAGGTTGGAGACAATG-3'  |
| mouse <i>Acta2</i> -RT-F   | 5'-CTGACAGAGGCACCACTGAA-3'  |
| mouse <i>Acta2</i> -RT-R   | 5'-CATCTCCAGAGTCCAGCACA-3'  |

|                            |                              |
|----------------------------|------------------------------|
| mouse <i>AFP</i> -RT-F     | 5'-ATGAAACCTATGCCCCTCCC-3'   |
| mouse <i>AFP</i> -RT-R     | 5'-TCAGGCTTTTGCTTCACCAGG-3'  |
| mouse <i>Albumin</i> -RT-F | 5'-CATGACACCATGCCTGCTGAT-3'  |
| mouse <i>Albumin</i> -RT-R | 5'-CTCTGATCTTCAGGAAGTGTAC-3' |
| mouse <i>Apoa2</i> -RT-F   | 5'-CTCCTGCGGCTAAGTGAGATG-3'  |
| mouse <i>Apoa2</i> -RT-R   | 5'-GAAAACAGGCAGAAGGTAGGGA-3' |
| mouse <i>Apob</i> -RT-F    | 5'-TACCTTGGGCATCGACACAC-3'   |
| mouse <i>Apob</i> -RT-R    | 5'-GTGCTGATGCTGCTCTCGTA-3'   |
| mouse <i>Apoc3</i> -RT-F   | 5'-GAACAAGCCTCCAAGACGGT -3'  |
| mouse <i>Apoc3</i> -RT-R   | 5'-GTTGGTTGGTCCTCAGGGTT-3'   |
| mouse <i>Coll1a1</i> -RT-F | 5'-TGA CTGGAAGAGCGGAGAGT-3'  |
| mouse <i>Coll1a1</i> -RT-R | 5'-GTTTCGGGCTGATGTACCAGT-3'  |
| mouse <i>Cyp8b1</i> -RT-F  | 5'-GGTACGCTTCCTCTATCGCC-3'   |
| mouse <i>Cyp8b1</i> -RT-R  | 5'-GGATGGCGTCTTATGGGGAG-3'   |
| mouse <i>Epcam</i> -RT-F   | 5'-GGAGTCCCTGTTCCATTCTTCT-3' |
| mouse <i>Epcam</i> -RT-R   | 5'-GCGATGACTGCTAATGACACCA-3' |
| mouse <i>Fabp2</i> -RT-F   | 5'-TGGAAAGGAGCTGATTGCTGT-3'  |
| mouse <i>Fabp2</i> -RT-R   | 5'-AAGAATCGCTTGGCCTCAACT-3'  |
| mouse <i>Gapdh</i> -RT-F   | 5'-CATGGCCTTCCGTGTTCCCT-3'   |
| mouse <i>Gapdh</i> -RT-R   | 5'-GCCTGCTTCACCACCTTCT-3'    |
| mouse <i>Hnf1a</i> -RT-F   | 5'-ACTTGCAGCAGCACAAACATC-3'  |
| mouse <i>Hnf1a</i> -RT-R   | 5'-GAATTGCTGAGCCACCTCTC-3'   |
| mouse <i>Hnf4a</i> -RT-F   | 5'-AGAGGTTCTGTCCCAGCAGA-3'   |
| mouse <i>Hnf4a</i> -RT-R   | 5'-ATGTA CTTGGCCCACTCGAC-3'  |
| mouse <i>Igf2bp1</i> -RT-F | 5'-CGGCAACCTCAACGAGAGT-3'    |
| mouse <i>Igf2bp1</i> -RT-R | 5'-GTAGCCGGATTTGACCAAGAA-3'  |
| mouse <i>Krt7</i> -RT-F    | 5'-AGGAGATCAACCGACGCAC-3'    |
| mouse <i>Krt7</i> -RT-R    | 5'-CACCTTGTTTCGTGTAGGCG-3'   |
| mouse <i>Krt19</i> -RT-F   | 5'-GTCCTACAGATTGACAATGC-3'   |



|                           |                              |
|---------------------------|------------------------------|
| mouse <i>Krt19</i> -RT-R  | 5'-CACGCTCTGGATCTGTGACAG-3'  |
| mouse <i>Mettl3</i> -RT-F | 5'-CTGGGCACTTGGATTTAAGGAA-3' |
| mouse <i>Mettl3</i> -RT-R | 5'-TGAGAGGTGGTGTAGCAACTT-3'  |
| mouse <i>Mttp</i> -RT-F   | 5'-CCAGGGCTTTTGCCTTGAAC-3'   |
| mouse <i>Mttp</i> -RT-R   | 5'-GAGGACCTGTCCCACAATGG-3'   |
| mouse <i>Pdgfrb</i> -RT-F | 5'-TTCCAGGAGTGATAACCAGCTT-3' |
| mouse <i>Pdgfrb</i> -RT-R | 5'-AGGGGGCGTGATGACTAGG-3'    |
| mouse <i>Sox9</i> -RT-F   | 5'-AGTACCCGCATCTGCACAAC-3'   |
| mouse <i>Sox9</i> -RT-R   | 5'-ACGAAGGGTCTCTTCTCGCT-3'   |

#### 4. Primers for m<sup>6</sup>A-RIP-qPCR

| Name                                                  | Sequences                   |
|-------------------------------------------------------|-----------------------------|
| mouse <i>Apof</i> -positive-m <sup>6</sup> A-1-RT-F   | 5'-GCCAAGGAACGAGGTCGAGA-3'  |
| mouse <i>Apof</i> -positive-m <sup>6</sup> A-1-RT-R   | 5'-AAGAGCAGCCGTGATCACCG-3'  |
| mouse <i>Apof</i> -negative-m <sup>6</sup> A-RT-F     | 5'-GCCCCCTGTCTCCAAATTCC-3'  |
| mouse <i>Apof</i> -negative-m <sup>6</sup> A-RT-R     | 5'-AAGCTGAAGCTGAAGAGCCC-3'  |
| mouse <i>Cebpa</i> -positive-m <sup>6</sup> A-1-RT-F  | 5'-GGCTGGAGACCCAGAGGATG-3'  |
| mouse <i>Cebpa</i> -positive-m <sup>6</sup> A-1-RT-R  | 5'-CTTTCAGGCCACACCGGAAT-3'  |
| mouse <i>Cebpa</i> -negative-m <sup>6</sup> A-RT-F    | 5'-CCGCCTTCAACGACGAGTTC-3'  |
| mouse <i>Cebpa</i> -negative-m <sup>6</sup> A-RT-R    | 5'-CCGGGTAGTCAAAGTCACCG-3'  |
| mouse <i>Cited2</i> -positive-m <sup>6</sup> A-1-RT-F | 5'-ATCAAGGAGCTGCCCCGAAC-3'  |
| mouse <i>Cited2</i> -positive-m <sup>6</sup> A-1-RT-R | 5'-CAACAGCTGACTCTGCTGGG-3'  |
| mouse <i>Cited2</i> -negative-m <sup>6</sup> A-RT-F   | 5'-ATGATGGCCATGAACCACGG-3'  |
| mouse <i>Cited2</i> -negative-m <sup>6</sup> A-RT-R   | 5'-CTGCTGCTGGTGTGATGCG-3'   |
| mouse <i>Egfr</i> -positive-m <sup>6</sup> A-1-RT-F   | 5'-CTTCTGGTAGCCATGCCAC-3'   |
| mouse <i>Egfr</i> -positive-m <sup>6</sup> A-1-RT-R   | 5'-GCCCACTTCTTGGCTCAGTG-3'  |
| mouse <i>Egfr</i> -negative-m <sup>6</sup> A-RT-F     | 5'-CCAACCTTTTACCGAGCCCTG-3' |
| mouse <i>Egfr</i> -negative-m <sup>6</sup> A-RT-R     | 5'-GACGGGCTGTTGAAGAAGCC-3'  |

|                                                        |                                     |
|--------------------------------------------------------|-------------------------------------|
| mouse <i>Foxm1</i> -positive-m <sup>6</sup> A-1-RT-F   | 5'-GAGCTGCAGATTCCCAGCCT-3'          |
| mouse <i>Foxm1</i> -positive-m <sup>6</sup> A-1-RT-R   | 5'-GATGTCTAGAAGGATCTTGCTGAGG<br>-3' |
| mouse <i>Foxm1</i> -positive-m <sup>6</sup> A-2-RT-F   | 5'-CTCAGCTGCCCTCAGGAAGA-3'          |
| mouse <i>Foxm1</i> -positive-m <sup>6</sup> A-2-RT-R   | 5'-GGGTCTCTAGAGAGCACAGACT-3'        |
| mouse <i>Foxm1</i> -negative-m <sup>6</sup> A-RT-F     | 5'-CCCTCGGGTTAGCTCATAACC-3'         |
| mouse <i>Foxm1</i> -negative-m <sup>6</sup> A-RT-R     | 5'-ATAAGCGATGCTGCCAGAGG-3'          |
| mouse <i>Hnfla</i> -positive-m <sup>6</sup> A-1-RT-F   | 5'-CCCTGTTTCCTTAGGACCTGCAA-3'       |
| mouse <i>Hnfla</i> -positive-m <sup>6</sup> A-1-RT-R   | 5'-GCAGGTCTCCCTCATAGCAGG-3'         |
| mouse <i>Hnfla</i> -negative-m <sup>6</sup> A-RT-F     | 5'-AATGGCCTTGGAGAAACGCG-3'          |
| mouse <i>Hnfla</i> -negative-m <sup>6</sup> A-RT-R     | 5'-CCTCCTCTGGGCTGAGGTT-3'           |
| mouse <i>Hnflβ</i> -positive-m <sup>6</sup> A-1-RT-F   | 5'-GAAACCCGTGGAGTCTCCCC-3'          |
| mouse <i>Hnflβ</i> -positive-m <sup>6</sup> A-1-RT-R   | 5'-GGCTCAGTTCATTAGCACACACC-3'       |
| mouse <i>Hnflβ</i> -negative-m <sup>6</sup> A-RT-F     | 5'-ACAATCCCCAGCAATCTCAG-3'          |
| mouse <i>Hnflβ</i> -negative-m <sup>6</sup> A-RT-R     | 5'-AGGCTGCTAGCCCACTGTT-3'           |
| mouse <i>Hnf4a</i> -positive-m <sup>6</sup> A-1-RT-F   | 5'-CCCTCAACTTCTTCACCCCT-3'          |
| mouse <i>Hnf4a</i> -positive-m <sup>6</sup> A-1-RT-R   | 5'-CGCTGGGAGAGAAGGGAGTT-3'          |
| mouse <i>Hnf4a</i> -negative-m <sup>6</sup> A-RT-F     | 5'-AGAGGTTCTGTCCCAGCAGA-3'          |
| mouse <i>Hnf4a</i> -negative-m <sup>6</sup> A-RT-R     | 5'-CACACGTCTGTGATGTTGGC-3'          |
| mouse <i>Ldlr</i> -positive-m <sup>6</sup> A-1-RT-F    | 5'-GAGGAGGAAGAGACCCACCC-3'          |
| mouse <i>Ldlr</i> -positive-m <sup>6</sup> A-1-RT-R    | 5'-GGGACTGGCTATGGTACCCA-3'          |
| mouse <i>Ldlr</i> -negative-m <sup>6</sup> A-RT-F      | 5'-GACGTGCTCCCAGGATGACT-3'          |
| mouse <i>Ldlr</i> -negative-m <sup>6</sup> A-RT-R      | 5'-TTTGGAGGCCGTGTCTCGG-3'           |
| mouse <i>Onecut1</i> -positive-m <sup>6</sup> A-1-RT-F | 5'-TCATGCCACCTGAATGCC-3'            |
| mouse <i>Onecut1</i> -positive-m <sup>6</sup> A-1-RT-R | 5'-CTTCCATTGCTGACCTGCGC-3'          |
| mouse <i>Onecut1</i> -negative-m <sup>6</sup> A-RT-F   | 5'-GAGCATGCCACACCTACA-3'            |
| mouse <i>Onecut1</i> -negative-m <sup>6</sup> A-RT-R   | 5'-GGTGGTGATGATGGTGAGGG-3'          |
| mouse <i>Onecut2</i> -positive-m <sup>6</sup> A-1-RT-F | 5'-GCACCTACTTCTGCAACAACAG-3'        |
| mouse <i>Onecut2</i> -positive-m <sup>6</sup> A-1-RT-R | 5'-GCGTGCTTTTTTCTGTTGATGGT-3'       |

|                                                      |                                     |
|------------------------------------------------------|-------------------------------------|
| mouse <i>Onecut2</i> -negative-m <sup>6</sup> A-RT-F | 5'-GTGGTTAATGTTGACCACATGGC-3'       |
| mouse <i>Onecut2</i> -negative-m <sup>6</sup> A-RT-R | 5'-GTAAAAGTTAGCCCCGATTGGGT-3'       |
| mouse <i>Ppara</i> -positive-m <sup>6</sup> A-1-RT-F | 5'-GCTTGGGGATGAAGAGGGCT-3'          |
| mouse <i>Ppara</i> -positive-m <sup>6</sup> A-1-RT-R | 5'-CACCCCCATTTTCGGTAGCAG-3'         |
| mouse <i>Ppara</i> -positive-m <sup>6</sup> A-2-RT-F | 5'-ACTGGCCATCTTCTGACGTC-3'          |
| mouse <i>Ppara</i> -positive-m <sup>6</sup> A-2-RT-R | 5'-CCCTCCATCCACTGGGCTAC-3'          |
| mouse <i>Ppara</i> -negative-m <sup>6</sup> A-RT-F   | 5'-ACACCCTCTCTCCAGCTTCC-3'          |
| mouse <i>Ppara</i> -negative-m <sup>6</sup> A-RT-R   | 5'-ACACTCGATG TTCAGGGCAC-3'         |
| mouse <i>Sirt1</i> -positive-m <sup>6</sup> A-1-RT-F | 5'-GCTACAAGACAGGAATTGACAGAT<br>G-3' |
| mouse <i>Sirt1</i> -positive-m <sup>6</sup> A-1-RT-R | 5'-GTTCCCAATGCTGGTGGAGC-3'          |
| mouse <i>Sirt1</i> -negative-m <sup>6</sup> A-RT-F   | 5'-AGTTCAGCCGTCTCTGTGT-3'           |
| mouse <i>Sirt1</i> -negative-m <sup>6</sup> A-RT-R   | 5'-GATCCTTTGGATTCCCTGCAA-3'         |

Notes: m<sup>6</sup>A-RIP-qPCR primers for m<sup>6</sup>A positive regions were marked as “positive-m<sup>6</sup>A-RT” (e.g., primers for two separate m<sup>6</sup>A positive regions in *Ppara* were listed as *Ppara*-positive-m<sup>6</sup>A-1-RT and *Ppara*-positive-m<sup>6</sup>A-2-RT), and primers for m<sup>6</sup>A negative regions were marked as “negative-m<sup>6</sup>A-RT” (e.g., primers for m<sup>6</sup>A negative regions in *Ppara* were listed as *Ppara*-negative-m<sup>6</sup>A-RT).

### Supplementary Table 2. Antibodies

| Antibodies                                     | Source           | Identifier      |
|------------------------------------------------|------------------|-----------------|
| m <sup>6</sup> A (N6-methyladenosine) antibody | Synaptic Systems | Cat# 202003     |
| anti-METTL3 antibody, Rabbit                   | Proteintech      | Cat# 15073-1-AP |
| anti-METTL3 antibody, Rabbit mAb               | Abcam            | Cat# ab195352   |
| anti-METTL14 antibody, Rabbit                  | Abclonal         | Cat# A8530      |

|                                                |                           |              |
|------------------------------------------------|---------------------------|--------------|
| mAb                                            |                           |              |
| anti-GAPDH antibody, Rabbit mAb                | Cell Signaling Technology | Cat# 2118    |
| anti-β-actin antibody, Rabbit mAb              | Cell Signaling Technology | Cat# 4970    |
| mouse IgG                                      | Beyotime                  | Cat# A7028   |
| anti-Albumin antibody, Mouse mAb               | R&D Systems               | Cat# MAB1455 |
| anti-SOX9 antibody, Rabbit                     | Sigma                     | Cat# AB5535  |
| anti-Ki67 antibody                             | Abcam                     | Cat# AB15580 |
| anti-alpha smooth muscle Actin (αSMA) antibody | Abcam                     | Cat# AB5694  |
| anti-Cytokeratin 19 (CK19) antibody            | Abcam                     | Cat# AB52625 |
| anti-mouse IgG HRP-linked antibody             | Cell Signaling Technology | Cat# 7076    |
| anti-rabbit IgG HRP-linked antibody            | Cell Signaling Technology | Cat# 7074    |
| anti-Hnf4a antibody, Rabbit mAb                | Cell Signaling Technology | Cat# 3113    |
| anti-Hnf1a antibody                            | Abcam                     | Cat# AB11974 |
| Recombinant Anti-PDGFR beta antibody           | Abcam                     | Cat# AB32570 |
| anti-IGF2BP1 antibody                          | Cell Signaling Technology | Cat# 8482    |
| anti-Lamin B1 antibody                         | Cell Signaling Technology | Cat#13435    |

**Supplementary Table 3. Reagents**

| <b>Reagents</b>                           | <b>Source</b>         | <b>Identifier</b> |
|-------------------------------------------|-----------------------|-------------------|
| 0.22 µm filter                            | PALL                  | PN4612            |
| 0.45 µm filter                            | PALL                  | PN4614            |
| 70 µm cell strainer                       | Sofra                 | 251200            |
| actinomycin D                             | Sigma-Aldrich         | A1410             |
| BODIPY™ 493/503                           | Invitrogen            | D3922             |
| ChamQ Universal SYBR qPCR Master Mix      | Vazyme                | Q711-03           |
| ClonExpress II One Step Cloning kit       | Vazyme                | C112              |
| Collagenase IV                            | Sigma-Aldrich         | C5138             |
| Complete Protease Inhibitor               | Roche                 | 04693132001       |
| Dako Real™ Kit                            | Dako                  | K5007             |
| Direct Mouse Genotyping kit               | ApexBio<br>Technology | k1025             |
| DMEM/F-12 (1:1) basic medium              | Thermo Scientific     | C11330500BT       |
| DMEM-high glucose medium                  | Thermo Scientific     | C11995500BT       |
| Dual-Luciferase Reporter Assay System     | Promega               | E1910             |
| EDTA antigen retrieval buffer             | ZSGB-BIO              | ZLI-9072          |
| Fetal bovine serum                        | PAN                   | P30-3302          |
| GenElute™ mRNA Miniprep Kit               | Sigma-Aldrich         | MRN10             |
| Glycogen                                  | Beyotime              | D0816             |
| Hematoxylin                               | Baso                  | BA4041            |
| Hoechst 33342                             | Beyotime              | C1022             |
| Hybond N+ membranes                       | GE Healthcare         | RPN303B           |
| Igepal CA-630                             | Sigma-Aldrich         | I8896             |
| Immonilon ECL Ultra Western HRP Substrate | Millipore             | WBULS0500         |

|                                                   |                   |             |
|---------------------------------------------------|-------------------|-------------|
| In Situ Cell Death Detection Kit                  | Roche             | 11684795910 |
| Lipofectamine™ 2000 kit                           | Invitrogen        | 11668-019   |
| Olive Oil                                         | MACKLIN           | O815211     |
| OCT compound                                      | Servicebio        | G6059       |
| Penicillin/streptomycin                           | KeyGEN Biotech    | KGY0023     |
| Phanta Max DNA Polymerase                         | Vazyme            | P505        |
| Phosphatase inhibitor                             | Roche             | 04906831001 |
| Propidium iodide solution                         | BD                | 556547      |
| Polybrene                                         | Sigma-Aldrich     | H9268       |
| PrimeScript™ RT Reagent Kit                       | Takara            | RR047B      |
| Protein A beads                                   | Thermo Scientific | 100-02D     |
| Protein G beads                                   | Thermo Scientific | 100-04D     |
| Proteinase K                                      | Thermo Scientific | AM2546      |
| Puromycin                                         | Thermo Scientific | A1113803    |
| RNasin® Ribonuclease Inhibitor-plus               | Promega           | N2611       |
| Stbl3 <i>E. coli</i>                              | TransGen Biotech  | CD521-01    |
| Tamoxifen                                         | Sigma-Aldrich     | T5648       |
| Triton™ X-100                                     | Sigma-Aldrich     | T8787       |
| TRIzol                                            | Ambion            | 15595018    |
| Tween-20                                          | Sigma-Aldrich     | P1379       |
| Type I Collagen, Rat tail                         | Invitrogen        | A10483-01   |
| Williams' Medium E                                | GIBCO             | 12551032    |
| <b>Plasmids</b>                                   |                   |             |
| pMIR-REPORT                                       | Ambion            | AM5795      |
| pRL Renilla Luciferase Control Reporter<br>Vector | Promega           | E2231       |

## **Supplementary Datasets**

### **Supplementary Dataset 1. Annotation of m<sup>6</sup>A peaks.**

Supplementary Dataset 1 was affiliated as an individual .xlsx file.

### **Supplementary Dataset 2. GO analysis of m<sup>6</sup>A-modified genes.**

Supplementary Dataset 2 was affiliated as an individual .xlsx file. Data were analyzed by over-representation test.

### **Supplementary Dataset 3. Time course liver tissue RNA-sequencing.**

Supplementary Dataset 3 was affiliated as an individual .xlsx file. Differentially expressed genes were analyzed by nbinomWaldTest.

### **Supplementary Dataset 4. mRNA splicing analysis for genes in livers from different age of Control and cKO mice.**

Supplementary Dataset 4 was affiliated as an individual .xlsx file. Data were analyzed by CASH<sup>1</sup>.

### **Supplementary Dataset 5. RNA-sequencing of mouse primary hepatocyte treated with actinomycin D.**

Supplementary Dataset 5 was affiliated as an individual .xlsx file.



## Supplementary references

- 1 Wu, W. *et al.* CASH: a constructing comprehensive splice site method for detecting alternative splicing events. *Brief Bioinform* **19**, 905-917, doi:10.1093/bib/bbx034 (2018).
