# Supplementary material for: Mettl3-mediated mRNA m6A modification controls postnatal liver development by modulating the transcription factor Hnf4a
Source: PubMed Central journal article supplement (PMC9355946; doi:10.1038/s41467-022-32169-4), 2022-08-05
Supplement: 41467_2022_32169_MOESM3_ESM.pdf [file 41467_2022_32169_MOESM3_ESM.pdf]

**Title: Supplementary Dataset 1.**

**Description:** Annotation of m6A peaks

**Title: Supplementary Dataset 2.**

**Description:** GO analysis of m6A-modified genes

**Title: Supplementary Dataset 3.**

**Description:** Time course liver tissue RNA-sequencing

**Title: Supplementary Dataset 4.**

**Description:** mRNA splicing analysis for genes in livers from different age of Control and cKO mice

**Title: Supplementary Dataset 5.**

**Description:** RNA-sequencing of mouse primary hepatocyte treated with actinomycin

D
